# Supplementary material for: Temporal and inter-individual changes in the integrated biochemical condition of the gonads of female swordfish (Xiphias gladius) from the Southeastern Pacific Ocean
Source: PeerJ. 2023 Jun 6;11:e15524. doi: 10.7717/peerj.15524 (PMC10252824; doi:10.7717/peerj.15524)
Supplement: Supplemental Information 1 — Catch data (ship, year of capture, sample code and morphometric parameters) and biochemical data (protein, glucose, lipids and energy) of female swordfish. [file peerj-11-15524-s001.xlsx]

## Sheet: Data
Ship	Code	id_travel	Year	Sample	tipe	sex	Lower Jaw Fork Lenght (LJFL)	Total weight (kg)	Total weight (g)	Gonad weight	Oocyte diameter (mm)	Gonadosomatic index (GSI)	Season	Size	Lipids (mg)	Lipids (%)	Protein (mg)	Protein (%)	Glucose (mg)	Glucose (%)	Energy (J mg-1)			Energy (J)			Mean
ARAUCO II	942380	ID14	2017	48	Gonad	Female	136	25.0267	25026.7	95	0.0678913	0.379594	Winter	Small	1.23333	2.46667	2.55692	5.11384	0.128324	0.256647	111.412		Lipids	39.54			Oocyte diameter	Standard deviation	Gonadosomatic index	Standard deviation
ARAUCO II	942380	ID14	2017	57	Gonad	Female	166	61.2163	61216.3	170	0.067076	0.277704	Winter	Small	0.833333	1.66667	4.15	8.3	0.104046	0.208092	132.84		Protein	23.64		Small-winter	0.0691004	0.00629091	0.305802	0.0599965
ARAUCO II	942380	ID16	2017	1	Gonad	Female	168	61.2163	61216.3	240	0.07929	0.392052	Winter	Small	0.533333	1.06667	3.27009	6.54017	0.107514	0.215029	100.237		Glucose	17.15		Small-spring	0.0740628	0.00437954	0.342948	0.0545437
ARAUCO II	942380	ID18	2017	52	Gonad	Female	128	26.2846	26284.6	70	0.0754673	0.266316	Winter	Small	0.7	1.4	3.67667	7.35334	0.124855	0.249711	116.736					Large-winter	0.1637	0.0132813	0.491065	0.0370101
PUERTO LINDO	942379	ID12	2017	25	Gonad	Female	164	60.2459	60245.9	205	0.0654473	0.340272	Winter	Small	0.466667	0.933333	3.97667	7.95334	0.083237	0.166474	113.888					Large-spring	0.171383	0.0257083	0.530936	0.0663015
PUERTO LINDO	942379	ID12	2017	36	Gonad	Female	153	43.391	43391	105	0.076168	0.241986	Winter	Small	0.933333	1.86667	2.9635	5.92701	0.0763006	0.152601	108.27
PUERTO LINDO	942379	ID17	2017	11	Gonad	Female	163	44.9004	44900.4	165	0.0633613	0.36748	Winter	Small	0.6	1.2	2.75992	5.51985	0.083237	0.166474	90.3961						Lipids (mg)	Standard deviation	Protein (mg)	Standard deviation	Glucose (mg)	Standard deviation	Energy (J mg)	Standard deviation
VAMA II	301014	ID11	2017	546	Gonad	Female	140	37.4792	37479.2	130	0.0621887	0.346859	Winter	Small	1.03333	2.06667	6.23233	12.4647	0.100578	0.201156	189.915					Small-winter	0.772727	0.244412	4.3026	1.51311	0.0996322	0.0191281	133.976	37.3107
VAMA II	301014	ID11	2017	551	Gonad	Female	161	55.9692	55969.2	150	0.0605593	0.268004	Winter	Small	0.733333	0.866667	7.1365	14.273	0.121387	0.242775	199.785					Small-spring	1.02727	0.380005	3.89684	0.802265	0.122743	0.0382909	134.845	28.8489
VAMA II	301014	ID15	2017	1059	Gonad	Female	146	39.1144	39114.4	100	0.0682487	0.25566	Winter	Small	0.933333	1.86667	5.70958	11.4192	0.0797688	0.159538	173.247					Large-winter	0.993939	0.31334	3.84041	1.5692	0.0722018	0.0187859	131.326	40.51
VAMA II	301014	ID15	2017	1060	Gonad	Female	145	39.4917	39491.7	90	0.074406	0.227896	Winter	Small	0.5	1	4.89642	9.79284	0.0867052	0.17341	137.008					Large-spring	4.06364	1.77942	3.66241	1.59503	0.150673	0.0420775	249.84	92.2883
ARAUCO II	942380	ID20	2017	179	Gonad	Female	170	75.7171	75717.1	230	0.0743213	0.303762	Spring	Small	0.666667	1.33333	3.32817	6.65634	0.0936416	0.187283	106.644
ARAUCO II	942380	ID21	2017	97	Gonad	Female	131	26.6619	26661.9	70	0.076848	0.262547	Spring	Small	1.16667	2.33333	5.02875	10.0575	0.10815	0.216301	166.864						Lipids (%)	Standard deviation	Protein (%)	Standard deviation	Glucose (%)	Standard deviation
ARAUCO II	942380	ID21	2017	99	Gonad	Female	137	28.7354	28735.4	90	0.0731	0.313203	Spring	Small	0.766667	1.53333	4.34744	8.69489	0.0776359	0.155272	134.419					Small-winter	1.49091	0.530218	8.6052	3.02621	0.199264	0.0382562
ARAUCO II	942380	ID21	2017	188	Gonad	Female	141	25.8666	25866.6	97	0.0752	0.375001	Spring	Small	0.966667	1.93333	4.65657	9.31313	0.100346	0.200691	150.024					Small-spring	2.05455	0.760011	7.79369	1.60453	0.245487	0.0765818
PUERTO LINDO	942379	ID19	2017	142	Gonad	Female	153	44.7746	44774.6	115	0.064632	0.256842	Spring	Small	1.5	3	4.19942	8.39884	0.110983	0.221965	160.488					Large-winter	1.98788	0.62668	7.68082	3.13839	0.144404	0.0375719
PUERTO LINDO	942379	ID19	2017	307	Gonad	Female	166	56.5982	56598.2	185	0.079838	0.326866	Spring	Small	0.966667	1.93333	3.44434	6.88867	0.114451	0.228902	121.609					Large-spring	8.12727	3.55883	7.32483	3.19005	0.301345	0.084155
PUERTO LINDO	942379	ID22	2017	91	Gonad	Female	150	35.9698	35969.8	150	0.0771053	0.417016	Spring	Small	0.5	1	3.909	7.81801	0.131792	0.263584	114.439
PUERTO LINDO	942379	ID22	2017	98	Gonad	Female	141	40.498	40498	150	0.076034	0.370389	Spring	Small	0.866667	1.73333	2.63117	5.26234	0.205087	0.410173	99.9861
PUERTO LINDO	942379	ID22	2017	269	Gonad	Female	147	33.3284	33328.4	120	0.0679867	0.360054	Spring	Small	0.8	1.6	3.09584	6.19167	0.0893642	0.178728	106.35
PUERTO LINDO	942379	ID22	2017	289	Gonad	Female	158	53.0762	53076.2	200	0.0768473	0.376816	Spring	Small	1.76667	3.53333	4.9545	9.909	0.149364	0.298728	189.54
PUERTO LINDO	942379	ID22	2017	392	Gonad	Female	141	36.5917	36591.7	150	0.072778	0.409929	Spring	Small	1.33333	2.66667	3.27009	6.54017	0.169364	0.338728	132.929
ARAUCO II	942380	ID14	2017	53	Gonad	Female	210	94.2385	94238.5	420	0.175399	0.445678	Winter	Large	0.9	1.8	4.2	8.4	0.0936416	0.187283	136.48
ARAUCO II	942380	ID14	2017	106	Gonad	Female	191	74.9937	74993.7	350	0.148611	0.466706	Winter	Large	0.866667	1.73333	2.41142	4.82285	0.0446821	0.0893642	92.0403
PUERTO LINDO	942379	ID12	2017	264	Gonad	Female	202	100.886	100886	460	0.17929	0.45596	Winter	Large	0.533333	1.06667	2.28267	4.56534	0.0589595	0.117919	76.0615
PUERTO LINDO	942379	ID17	2017	47	Gonad	Female	235	129.294	129294	675	0.146893	0.522065	Winter	Large	1.13333	2.26667	3.15392	6.30784	0.065896	0.131792	120.501
PUERTO LINDO	942379	ID17	2017	66	Gonad	Female	210	94.4587	94458.7	500	0.177662	0.529332	Winter	Large	1.5	3	2.10842	4.21684	0.0520231	0.104046	110.045
VAMA II	301014	ID11	2017	586	Gonad	Female	191	79.7422	79742.2	400	0.142457	0.501617	Winter	Large	0.933333	1.86667	3.73475	7.46951	0.0728324	0.145665	126.443
VAMA II	301014	ID11	2017	630	Gonad	Female	213	106.911	106911	580	0.164085	0.542506	Winter	Large	1.03333	2.06667	6.27783	12.5557	0.0728324	0.145665	190.515
VAMA II	301014	ID11	2017	720	Gonad	Female	227	127.791	127791	690	0.171327	0.539944	Winter	Large	1.46667	2.93333	4.08325	8.16651	0.083237	0.166474	155.948
VAMA II	301014	ID15	2017	343	Gonad	Female	217	118.143	118143	540	0.158296	0.457072	Winter	Large	0.633333	1.26667	2.28267	4.56534	0.0936416	0.187283	80.6103
VAMA II	301014	ID15	2017	644	Gonad	Female	212	135.086	135086	650	0.175307	0.481173	Winter	Large	1.2	2.4	5.82575	11.6515	0.100983	0.201965	186.901
VAMA II	301014	ID15	2017	897	Gonad	Female	198	71.7922	71792.2	330	0.161374	0.45966	Winter	Large	0.733333	1.46667	5.88383	11.7677	0.0554913	0.110983	169.042
ARAUCO II	942380	ID20	2017	2	Gonad	Female	201	84.0245	84024.5	380	0.164313	0.452249	Spring	Large	4.9	9.8	2.57309	5.14618	0.142197	0.284393	257.012
ARAUCO II	942380	ID20	2017	111	Gonad	Female	190	94.7103	94710.3	430	0.1449	0.454016	Spring	Large	4.06667	8.13333	3.909	7.81801	0.115491	0.230983	255.186
ARAUCO II	942380	ID21	2017	103	Gonad	Female	190	78.2328	78232.8	360	0.135488	0.460165	Spring	Large	1.76667	3.53333	1.87609	3.75218	0.125491	0.250983	116.357
ARAUCO II	942380	ID21	2017	130	Gonad	Female	200	109.678	109678	650	0.196574	0.592642	Spring	Large	2.6	5.2	4.37367	8.74734	0.180347	0.360694	209.29
PUERTO LINDO	942379	ID19	2017	63	Gonad	Female	218	176.092	176092	1100	0.177029	0.624675	Spring	Large	5.86667	11.7333	2.515	5.03001	0.179306	0.358613	294.498
PUERTO LINDO	942379	ID19	2017	201	Gonad	Female	208	93.9556	93955.6	460	0.158295	0.489593	Spring	Large	3.93333	7.86667	4.66409	9.32817	0.128324	0.256647	267.984
PUERTO LINDO	942379	ID19	2017	246	Gonad	Female	262	203.009	203009	1150	0.171327	0.566477	Spring	Large	2.96667	5.93333	2.77251	5.54501	0.16341	0.326821	185.647
PUERTO LINDO	942379	ID19	2017	341	Gonad	Female	198	88.6727	88672.7	485	0.139562	0.546955	Spring	Large	2.4	4.8	4.88867	9.77735	0.106301	0.212601	212.287
PUERTO LINDO	942379	ID22	2017	28	Gonad	Female	240	196.846	196846	1200	0.204719	0.609614	Spring	Large	6.83333	13.6667	3.79284	7.58567	0.21052	0.42104	363.463
PUERTO LINDO	942379	ID22	2017	119	Gonad	Female	207	103.452	103452	490	0.183363	0.47365	Spring	Large	2.7	5.4	1.75992	3.51985	0.0904046	0.180809	149.913
PUERTO LINDO	942379	ID22	2017	198	Gonad	Female	231	157.822	157822	900	0.209649	0.570263	Spring	Large	6.66667	13.3333	7.16167	14.3233	0.215607	0.431214	436.599
