# Supplementary material for: Temporal and inter-individual changes in the integrated biochemical condition of the gonads of female swordfish (Xiphias gladius) from the Southeastern Pacific Ocean
Source: PeerJ. 2023 Jun 6;11:e15524. doi: 10.7717/peerj.15524 (PMC10252824; doi:10.7717/peerj.15524)
Supplement: Supplemental Information 2 — The fatty acids profile of gonads of female swordfish in two different seasons (winter and spring) with two different size (small and large). [file peerj-11-15524-s002.xlsx]

## Sheet: mg-mL
Dry weight (mg)	50					Concentration (mg /mL)
Dry weight (g)	0.05					Small winter female											Small spring female											Large winter female											Large spring female
				Fatty acid	Fatty acid name	48	57	1	52	25	36	11	546	551	1059	1060	179	97	99	178	142	307	91	98	269	289	392	53	106	264	47	66	586	630	720	343	644	897	2	111	103	130	63	201	246	341	28	119	198
Sample	Lipid (mg)	Lipid (g)		C14:0	Myristic acid	0	0	0	0	0	0	0	0	0	0	0	0	0	0	0	0	0	0	0	0	0	0	0	0	0	0	0	0	1.24	1.24	0	0.91	0	1.38	8.34	3.1	2.92	7.05	20.67	1.59	0	1.09	5.65	11.34
48	1.23333	0.00123333		C14:1	Myristoleic acid	0	0	0	0	0	0	0	0	0	0	0	0	0	1.24	1.87	0	0	0	0	0	1.29	1.24	0	0	0	0	0	0	0	0	0	0	0	0	0	0	0	0.69	0	0	0	0	0	0.77
57	0.833333	0.000833333		C15:0	Pentadecylic acid	0	0	0	0	0	0	0	0	0	0	0	0	0	0	0	0	0	0	0	0		0	0	0	0	0	0	0	0	0	0	0	0	0	2.11	0	1.14	2.22	0	0	2.15	0	1.95	3.04
1	0.533333	0.000533333		C16:0	Palmitic acid	3.64	5.1	3.16	3.17	5.31	2.86	2.08	6.82	8.24	3.08	13.28	6.62	6.2	6.69	12.26	6.02	2.85	11.4	1.4	2.54	19.24	6.69	8.42	9.15	3.65	4.07	9.44	3.02	12.11	19.6	2.32	9.22	2.1	12.55	92.63	40.36	36.93	89.55	30	28.65	83.82	25.64	37.23	129.34
52	0.7	0.0007		C16:1	Palmitoleic acid	0	0.81	0	1.56	0	0	0	0	1.17	0	2.11	0	0	1.53	1.61	0.98	0	0	0	0	1.98	1.53	2.35	1.02	0	0	1.48	1.47	2.57	2.75	0	2.01	0	2.45	12.19	7.31	5.83	18.31	0	4.24	10.94	3.78	6.08	24.51
25	0.466667	0.000466667		C17:0	Margaric acid	0	0	0	0	0	0	0	0	1.14	0	1.76	0	0	0	0.98	0	0	0	0	0	1.44	0	0	0	0	0	0	0	0	1.2	0	0	0	0	4.43	0	1.87	4.66	0	1.49	3.63	1.16	1.79	5.65
36	0.933333	0.000933333		C17:1	Heptadecenoic acid	0	0	0	0	0	0	0	0	0	0	0	0	0	0	0	0	0	0	0	0	0	0	0	0	0	0	0	0	0	0	0	0	0	0	3.64	0	1.23	3.74	0	1.49	2.07	0	0	4.07
11	0.6	0.0006		C18:0	Stearic acid	2.48	3.62	2.04	2.07	3.33	1.98	1.36	3.71	4.87	2.08	6.69	5.79	3.61	5.76	5.72	3.79	2.41	8.19	0	2	10.75	5.76	4.33	4.34	2.7	2.35	5.12	1.88	5.24	9.59	1.62	4.31	1.55	7.01	46.53	20.58	15.19	41.05	10.86	9.94	39.69	9.8	18.09	72.15
546	1.03333	0.00103333		C18:1n9	Oleic acid	1.84	2.8	2.27	1.26	2.86	0	0	4.42	5.71	0	10.48	4.51	5.49	6.24	13.27	4.34	1.15	0	0	2.86	22.85	6.24	11.2	9.65	4.04	5.37	8.53	1.32	16.55	21.24	0	18.99	0	13.67	203.55	50.15	62.18	192.07	20.06	97.34	101.69	38.73	54.2	249.69
551	0.733333	0.000733333		C18:2n6t	Linoelaidic acid	0	0	0	0	0	0	0	0	0	0	0	0	0	0	0	0	0	0	0	0	0	0	0	0	0	0	0	0	0	0	0	0	0	0	2.02	0	0.66	4.18	0	0.77	1.24	0	0.93	5.93
1059	0.933333	0.000933333		C18:2n6c	Linoleic acid	0	0	0	0	0	0	0	0	0	0	0	0	0	0	0	0	0	0	0	0	0	0	0	0	0	0	0	0	0	0	0	0	0	0	0	0	0	1.61	0	0	0	0	0	2.11
1060	0.5	0.0005		C18:3n3	α-Linolenic acid	0	0	0	0	0	0	0	0	0	0	0	0	0	0	0	0	0	0	0	0	0	0	0	0	0	0	0	0	0	0	0	0	0	0	0.96	0	0	3.01	0	0	0	0	0	4.37
179	0.666667	0.000666667		C18:3n6	γ-linolenic acid	0	0	0	0	0	0	0	0	0	0	0	0	0	0	0	0	0	0	0	0	0	0	0	0	0	0	0	0	0	0	0	0	0	0	0	0	0	0	0	0	0	0	0	0.84
97	1.16667	0.00116667		C20:1	Eicosenoic acid	0	0	0	0	0	0	0	0	0	0	0	0	0	0	0	0	0	0	0	0	0	0	1.62	1.75	0	0	0	0	1.9	2.47	0	4.33	0	1.87	38.14	12.12	11.37	33.78	18.09	7.38	15.98	5.18	5.51	34.04
99	0.766667	0.000766667		C20:2n6	Eicosadienoic acid	0	0	0	0	0	0	0	0	0	0	0	0	0	0	0	0	0	0	0	0	0	0	0	0	0	0	0	0	0	0	0	0	0	0	0	0	0	1.8	0	0	0	0	0	2.28
188	0.966667	0.000966667		C20:3n3	Eicosatrienoic acid	0	1.96	0	0	0	0	0	2.49	3.49	0	6.6	0	0	2.38	1.7	0	0	0	0	0	2.27	2.38	1.62	1.41	0	0	1.68	0	1.83	1.58	0	1.38	0	3.63	7.05	8	5.65	15.78	7.39	5.46	12.4	6.79	1.81	24.62
142	1.5	0.0015		C20:5n3	Eicosapentaenoic acid	0	0	0	0	0	0	0	0	0	0	0	0	0	0	0	0	0	0	0	0	0	0	0	0	0	0	0	0	2.86	0	0	2.33	0	0	13.6	0	7.51	24.01	0	3.15	0	8.81	2.9	39.19
307	0.966667	0.000966667		C21:0	Heneicosylic acid	0	0	0	0	0	0	0	0	0	0	0	0	0	0	0	0	0	0	0	0	0	0	0	0	0	0	0	0	0	0	0	0	0	0	0	0	0	0	0	0	0	0	0	1.82
91	0.5	0.0005		C22:1	Erucic acid	0	0	0	0	0	0	0	0	0	0	0	0	0	0	0	0	0	0	0	0	0	0	0	0	0	0	0	0	0	0	0	0	0	0	5.55	0	0	3.64	0	0	2.32	0	0	3.65
98	0.866667	0.000866667		C23:0	Tricosylic acid	0	0	0	0	0	0	0	0	0	0	0	0	0	0	0	0	0	0	0	0	0	0	0	0	0	0	0	0	0	0	0	0	0	0	7.62	0	3.74	13.99	0	6.92	6.23	5.12	0	18.04
269	0.8	0.0008		C22:6n3	Docosahexaenoic acid	3.54	6.23	1.41	1.38	1.47	0	0	8.51	10.97	0	16.02	2.01	1.63	7	6.48	5.54	1.6	0	0	0	14.44	7	16.76	19.54	0	6.89	11.8	2.65	23.5	14.9	0	21.55	0	16.97	114.65	16.12	59.08	255.16	0	53.48	76.95	70.18	17.5	252.65
289	1.76667	0.00176667		C24:0	Lignoceric acid	0	0	0	0	0	0	0	0	0	0	0	0	0	0	0	0	0	0	0	0	0	0	0	0	0	0	0	0	0	0	0	0	0	0	0	0	0	0	0	0	1.44	0	0	2.62
392	1.33333	0.00133333		C24:1	Nervonic acid	0	0	0	0	0	0	0	0	0	0	0	0	0	0	0	0	0	0	0	0	0	0	0	0	0	0	0	0	0	0	0	0	0	0	3.45	0	0	2	0	0	0	0	1.87	0
53	0.9	0.0009
106	0.866667	0.000866667
264	0.533333	0.000533333
47	1.13333	0.00113333
66	1.5	0.0015
586	0.933333	0.000933333
630	1.03333	0.00103333
720	1.46667	0.00146667
343	0.633333	0.000633333
644	1.2	0.0012
897	0.733333	0.000733333
2	4.9	0.0049
111	4.06667	0.00406667
103	1.76667	0.00176667
130	2.6	0.0026
63	5.86667	0.00586667
201	3.93333	0.00393333
246	2.96667	0.00296667
341	2.4	0.0024
28	6.83333	0.00683333
119	2.7	0.0027
198	6.66667	0.00666667

## Sheet: mg
			Weight (mg)
			Small winter female											Small spring female											Large winter female											Large spring female
	Fatty acid	Fatty acid name	48	57	1	52	25	36	11	546	551	1059	1060	179	97	99	178	142	307	91	98	269	289	392	53	106	264	47	66	586	630	720	343	644	897	2	111	103	130	63	201	246	341	28	119	198
	C14:0	Myristic acid																													0.0062	0.0062		0.00455		0.0069	0.0417	0.0155	0.0146	0.03525	0.10335	0.00795		0.00545	0.02825	0.0567
	C14:1	Myristoleic acid														0.0062	0.00935						0.00645	0.0062																0.00345						0.00385
	C15:0	Pentadecylic acid																																			0.01055		0.0057	0.0111			0.01075		0.00975	0.0152
	C16:0	Palmitic acid	0.0182	0.0255	0.0158	0.01585	0.02655	0.0143	0.0104	0.0341	0.0412	0.0154	0.0664	0.0331	0.031	0.03345	0.0613	0.0301	0.01425	0.057	0.007	0.0127	0.0962	0.03345	0.0421	0.04575	0.01825	0.02035	0.0472	0.0151	0.06055	0.098	0.0116	0.0461	0.0105	0.06275	0.46315	0.2018	0.18465	0.44775	0.15	0.14325	0.4191	0.1282	0.18615	0.6467
	C16:1	Palmitoleic acid		0.00405		0.0078					0.00585		0.01055			0.00765	0.00805	0.0049					0.0099	0.00765	0.01175	0.0051			0.0074	0.00735	0.01285	0.01375		0.01005		0.01225	0.06095	0.03655	0.02915	0.09155		0.0212	0.0547	0.0189	0.0304	0.12255
	C17:0	Margaric acid									0.0057		0.0088				0.0049						0.0072									0.006					0.02215		0.00935	0.0233		0.00745	0.01815	0.0058	0.00895	0.02825
	C17:1	Heptadecenoic acid																																			0.0182		0.00615	0.0187		0.00745	0.01035			0.02035
	C18:0	Stearic acid	0.0124	0.0181	0.0102	0.01035	0.01665	0.0099	0.0068	0.01855	0.02435	0.0104	0.03345	0.02895	0.01805	0.0288	0.0286	0.01895	0.01205	0.04095	0.003	0.01	0.05375	0.0288	0.02165	0.0217	0.0135	0.01175	0.0256	0.0094	0.0262	0.04795	0.0081	0.02155	0.00775	0.03505	0.23265	0.1029	0.07595	0.20525	0.0543	0.0497	0.19845	0.049	0.09045	0.36075
	C18:1n9	Oleic acid	0.0092	0.014	0.01135	0.0063	0.0143			0.0221	0.02855		0.0524	0.02255	0.02745	0.0312	0.06635	0.0217	0.00575			0.0143	0.11425	0.0312	0.056	0.04825	0.0202	0.02685	0.04265	0.0066	0.08275	0.1062		0.09495		0.06835	1.01775	0.25075	0.3109	0.96035	0.1003	0.4867	0.50845	0.19365	0.271	1.24845
	C18:2n6t	Linoelaidic acid																																			0.0101		0.0033	0.0209		0.00385	0.0062		0.00465	0.02965
	C18:2n6c	Linoleic acid																																						0.00805						0.01055
	C18:3n3	α-Linolenic acid																																			0.0048			0.01505						0.02185
	C18:3n6	γ-linolenic acid																																												0.0042
	C20:1	Eicosenoic acid																							0.0081	0.00875					0.0095	0.01235		0.02165		0.00935	0.1907	0.0606	0.05685	0.1689	0.09045	0.0369	0.0799	0.0259	0.02755	0.1702
	C20:2n6	Eicosadienoic acid																																						0.009						0.0114
	C20:3n3	Eicosatrienoic acid		0.0098						0.01245	0.01745		0.033			0.0119	0.0085						0.01135	0.0119	0.0081	0.00705			0.0084		0.00915	0.0079		0.0069		0.01815	0.03525	0.04	0.02825	0.0789	0.03695	0.0273	0.062	0.03395	0.00905	0.1231
	C20:5n3	Eicosapentaenoic acid																													0.0143			0.01165			0.068		0.03755	0.12005		0.01575		0.04405	0.0145	0.19595
	C21:0	Heneicosylic acid																																												0.0091
	C22:1	Erucic acid																																			0.02775			0.0182			0.0116			0.01825
	C23:0	Tricosylic acid																																			0.0381		0.0187	0.06995		0.0346	0.03115	0.0256		0.0902
	C22:6n3	Docosahexaenoic acid	0.0177	0.03115	0.00705	0.0069	0.00735			0.04255	0.05485		0.0801	0.01005	0.00815	0.035	0.0324	0.0277	0.008				0.0722	0.035	0.0838	0.0977		0.03445	0.059	0.01325	0.1175	0.0745		0.10775		0.08485	0.57325	0.0806	0.2954	1.2758		0.2674	0.38475	0.3509	0.0875	1.26325
	C24:0	Lignoceric acid																																									0.0072			0.0131
	C24:1	Nervonic acid																																			0.01725			0.01					0.00935
			0.0575

## Sheet: mg g DW
			Concentration (mg g-1 of dry weight)
			Small winter female											Small spring female											Large winter female											Large spring female
	Fatty acid	Fatty acid name	48	57	1	52	25	36	11	546	551	1059	1060	179	97	99	178	142	307	91	98	269	289	392	53	106	264	47	66	586	630	720	343	644	897	2	111	103	130	63	201	246	341	28	119	198
	C14:0	Myristic acid																													0.124	0.124		0.091		0.138	0.834	0.31	0.292	0.705	2.067	0.159		0.109	0.565	1.134
	C14:1	Myristoleic acid														0.124	0.187						0.129	0.124																0.069						0.077
	C15:0	Pentadecylic acid																																			0.211		0.114	0.222			0.215		0.195	0.304
	C16:0	Palmitic acid	0.364	0.51	0.316	0.317	0.531	0.286	0.208	0.682	0.824	0.308	1.328	0.662	0.62	0.669	1.226	0.602	0.285	1.14	0.14	0.254	1.924	0.669	0.842	0.915	0.365	0.407	0.944	0.302	1.211	1.96	0.232	0.922	0.21	1.255	9.263	4.036	3.693	8.955	3	2.865	8.382	2.564	3.723	12.934
	C16:1	Palmitoleic acid		0.081		0.156					0.117		0.211			0.153	0.161	0.098					0.198	0.153	0.235	0.102			0.148	0.147	0.257	0.275		0.201		0.245	1.219	0.731	0.583	1.831		0.424	1.094	0.378	0.608	2.451
	C17:0	Margaric acid									0.114		0.176				0.098						0.144									0.12					0.443		0.187	0.466		0.149	0.363	0.116	0.179	0.565
	C17:1	Heptadecenoic acid																																			0.364		0.123	0.374		0.149	0.207			0.407
	C18:0	Stearic acid	0.248	0.362	0.204	0.207	0.333	0.198	0.136	0.371	0.487	0.208	0.669	0.579	0.361	0.576	0.572	0.379	0.241	0.819	0.06	0.2	1.075	0.576	0.433	0.434	0.27	0.235	0.512	0.188	0.524	0.959	0.162	0.431	0.155	0.701	4.653	2.058	1.519	4.105	1.086	0.994	3.969	0.98	1.809	7.215
	C18:1n9	Oleic acid	0.184	0.28	0.227	0.126	0.286			0.442	0.571		1.048	0.451	0.549	0.624	1.327	0.434	0.115			0.286	2.285	0.624	1.12	0.965	0.404	0.537	0.853	0.132	1.655	2.124		1.899		1.367	20.355	5.015	6.218	19.207	2.006	9.734	10.169	3.873	5.42	24.969
	C18:2n6t	Linoelaidic acid																																			0.202		0.066	0.418		0.077	0.124		0.093	0.593
	C18:2n6c	Linoleic acid																																						0.161						0.211
	C18:3n3	α-Linolenic acid																																			0.096			0.301						0.437
	C18:3n6	γ-linolenic acid																																												0.084
	C20:1	Eicosenoic acid																							0.162	0.175					0.19	0.247		0.433		0.187	3.814	1.212	1.137	3.378	1.809	0.738	1.598	0.518	0.551	3.404
	C20:2n6	Eicosadienoic acid																																						0.18						0.228
	C20:3n3	Eicosatrienoic acid		0.196						0.249	0.349		0.66			0.238	0.17						0.227	0.238	0.162	0.141			0.168		0.183	0.158		0.138		0.363	0.705	0.8	0.565	1.578	0.739	0.546	1.24	0.679	0.181	2.462
	C20:5n3	Eicosapentaenoic acid																													0.286			0.233			1.36		0.751	2.401		0.315		0.881	0.29	3.919
	C21:0	Heneicosylic acid																																												0.182
	C22:1	Erucic acid																																			0.555			0.364			0.232			0.365
	C23:0	Tricosylic acid																																			0.762		0.374	1.399		0.692	0.623	0.512		1.804
	C22:6n3	Docosahexaenoic acid	0.354	0.623	0.141	0.138	0.147			0.851	1.097		1.602	0.201	0.163	0.7	0.648	0.554	0.16				1.444	0.7	1.676	1.954		0.689	1.18	0.265	2.35	1.49		2.155		1.697	11.465	1.612	5.908	25.516		5.348	7.695	7.018	1.75	25.265
	C24:0	Lignoceric acid																																									0.144			0.262
	C24:1	Nervonic acid																																			0.345			0.2					0.187
		Total Fatty acids	1.15	2.052	0.888	0.944	1.297	0.484	0.344	2.595	3.559	0.516	5.694	1.893	1.693	3.084	4.389	2.067	0.801	1.959	0.2	0.74	7.426	3.084	4.63	4.686	1.039	1.868	3.805	1.034	6.78	7.457	0.394	6.503	0.365	5.953	56.646	15.774	21.53	71.83	10.707	22.19	36.055	17.628	15.551	89.272

## Sheet: %
			Percentage (%)
			Small winter female											Small spring female											Large winter female											Large spring female
	Fatty acid	Fatty acid name	48	57	1	52	25	36	11	546	551	1059	1060	179	97	99	178	142	307	91	98	269	289	392	53	106	264	47	66	586	630	720	343	644	897	2	111	103	130	63	201	246	341	28	119	198
	C14:0	Myristic acid																													1.82891	1.66287		1.39935		2.31816	1.4723	1.96526	1.35625	0.981484	19.3051	0.716539		0.618334	3.63321	1.27028
	C14:1	Myristoleic acid														4.02075	4.26065						1.73714	4.02075																0.0960601						0.0862532
	C15:0	Pentadecylic acid																																			0.372489		0.529494	0.309063			0.596311		1.25394	0.340532
	C16:0	Palmitic acid	31.6522	24.8538	35.5856	33.5805	40.9406	59.0909	60.4651	26.2813	23.1526	59.6899	23.3228	34.9709	36.6214	21.6926	27.9335	29.1243	35.5805	58.193	70	34.3243	25.909	21.6926	18.1857	19.5262	31.7391	21.788	24.8095	29.207	17.8614	26.284	58.8832	14.1781	57.5342	21.0818	16.3524	25.5864	17.1528	12.4669	28.0191	12.9112	23.2478	14.545	23.9406	14.4883
	C16:1	Palmitoleic acid		3.94737		16.5254					3.28744		3.70566			4.96109	3.66826	4.74117					2.66631	4.96109	5.07559	2.1767			3.88962	14.2166	3.79056	3.68781		3.09088		4.11557	2.15196	4.63421	2.70785	2.54907		1.91077	3.03425	2.14432	3.90972	2.74554
	C17:0	Margaric acid									3.20315		3.09097				2.23285						1.93913									1.60923					0.78205		0.868556	0.648754		0.671474	1.0068	0.658044	1.15105	0.632897
	C17:1	Heptadecenoic acid																																			0.642587		0.571296	0.520674		0.671474	0.574123			0.45591
	C18:0	Stearic acid	21.5652	17.6413	22.973	21.928	25.6746	40.9091	39.5349	14.2967	13.6836	40.3101	11.7492	30.5864	21.3231	18.677	13.0326	18.3358	30.0874	41.807	30	27.027	14.4762	18.677	9.35205	9.26163	23.4783	12.5803	13.456	18.1818	7.72861	12.8604	41.1168	6.62771	42.4658	11.7756	8.21417	13.0468	7.05527	5.71488	10.1429	4.4795	11.0082	5.55934	11.6327	8.08204
	C18:1n9	Oleic acid	16	13.6452	25.5631	13.3475	22.0509			17.0328	16.0438		18.4053	23.8246	32.4276	20.2335	30.2347	20.9966	14.3571			38.6486	30.7703	20.2335	24.1901	20.5933	35.1304	28.7473	22.4179	12.766	24.41	28.4833		29.2019		22.9632	35.9337	31.7928	28.8806	26.7395	18.7354	43.8666	28.2041	21.9707	34.8531	27.9696
	C18:2n6t	Linoelaidic acid																																			0.356601		0.306549	0.58193		0.347003	0.343919		0.598032	0.664262
	C18:2n6c	Linoleic acid																																						0.22414						0.236356
	C18:3n3	α-Linolenic acid																																			0.169474			0.419045						0.489515
	C18:3n6	γ-linolenic acid																																												0.0940945
	C20:1	Eicosenoic acid																							3.49892	3.73453					2.80236	3.31232		6.65847		3.14127	6.73304	7.68353	5.281	4.70277	16.8955	3.32582	4.43212	2.93851	3.54318	3.81307
	C20:2n6	Eicosadienoic acid																																						0.250592						0.255399
	C20:3n3	Eicosatrienoic acid		9.55166						9.59538	9.80613		11.5911			7.71725	3.87332						3.05683	7.71725	3.49892	3.00896			4.41524		2.69912	2.11881		2.1221		6.09777	1.24457	5.07164	2.62425	2.19685	6.90203	2.46057	3.43919	3.85183	1.16391	2.75786
	C20:5n3	Eicosapentaenoic acid																													4.21829			3.58296			2.40088		3.48816	3.34261		1.41956		4.99773	1.86483	4.38995
	C21:0	Heneicosylic acid																																												0.203871
	C22:1	Erucic acid																																			0.979769			0.506752			0.643461			0.408863
	C23:0	Tricosylic acid																																			1.3452		1.73711	1.94765		3.11852	1.72792	2.90447		2.02079
	C22:6n3	Docosahexaenoic acid	30.7826	30.3606	15.8784	14.6186	11.3338			32.7938	30.8233		28.1349	10.6181	9.62788	22.6978	14.7642	26.8021	19.975				19.4452	22.6978	36.1987	41.6987		36.8844	31.0118	25.6286	34.6608	19.9812		33.1386		28.5066	20.2397	10.2193	27.4408	35.5228		24.1009	21.3424	39.8117	11.2533	28.3011
	C24:0	Lignoceric acid																																									0.39939			0.293485
	C24:1	Nervonic acid																																			0.609046			0.278435					1.2025

## Sheet: Summary
	Fatty acid	Fatty acid name	Small winter female	Standard deviation	Percentage (%)	Small spring female	Standard deviation	Percentage (%)	Large winter female	Standard deviation	Percentage (%)	Large spring female	Standard deviation	Percentage (%)
	C14:0	Myristic acid	0	0	0	0	0	0	0.113	0.0190526	2.36387	0.6313	0.607584	1.72335
	C15:0	Pentadecylic acid	0	0	0	0	0	0	0	0	0	0.210167	0.0607402	0.573723
	C16:0	Palmitic acid	0.515818	0.327987	20.7042	0.744636	0.514844	23.3649	0.755455	0.529689	15.8035	5.51545	3.7157	15.0563
	C17:0	Margaric acid	0.145	0.0438406	5.82008	0.121	0.0325269	3.79669	0.12	-	2.5103	0.3085	0.171418	0.842158
	C18:0	Stearic acid	0.311182	0.156864	12.4904	0.494364	0.289768	15.5119	0.391182	0.234199	8.18321	2.64445	2.06931	7.21896
	C21:0	Heneicosylic acid	0	0	0	0	0	0	0	0	0	0.182	-	0.496832
	C23:0	Tricosylic acid	0	0	0	0	0	0	0	0	0	0.880857	0.521202	2.40461
	C24:0	Lignoceric acid	0	0	0	0	0	0	0	0	0	0.203	0.0834386	0.554159
	C14:1	Myristoleic acid	0	0	0	0.141	0.0307571	4.42424	0	0	0	0.073	0.00565685	0.199279
	C16:1	Palmitoleic acid	0.14125	0.0556799	5.66956	0.1526	0.0357533	4.78822	0.195	0.0646039	4.07924	0.9564	0.70886	2.61083
	C17:1	Heptadecenoic acid	0	0	0	0	0	0	0	0	0	0.270667	0.125409	0.738879
	C18:1n9	Oleic acid	0.3955	0.299953	15.8748	0.743889	0.667902	23.3414	1.07656	0.689936	22.5207	9.84845	8.07475	26.8848
	C20:1	Eicosenoic acid	0	0	0	0	0	0	0.2414	0.111912	5.04989	1.66782	1.29175	4.55289
	C22:1	Erucic acid	0	0	0	0	0	0	0	0	0	0.379	0.132924	1.03461
	C24:1	Nervonic acid	0	0	0	0	0	0	0	0	0	0.244	0.0877097	0.666083
	C18:2n6t	Linoelaidic acid	0	0	0	0	0	0	0	0	0	0.224714	0.203311	0.613436
	C18:2n6c	Linoleic acid	0	0	0	0	0	0	0	0	0	0.186	0.0353553	0.507752
	C18:3n3	α-Linolenic acid	0	0	0	0	0	0	0	0	0	0.278	0.17166	0.758898
	C18:3n6	γ-linolenic acid	0	0	0	0	0	0	0	0	0	0.084	-	0.229307
	C20:2n6	Eicosadienoic acid	0	0	0	0	0	0	0	0	0	0.204	0.0339411	0.556889
	C20:3n3	Eicosatrienoic acid	0.3635	0.207597	14.5903	0.21825	0.0325819	6.84816	0.158333	0.0169076	3.3122	0.896182	0.646578	2.44644
	C20:5n3	Eicosapentaenoic acid	0	0	0	0	0	0	0.2595	0.0374767	5.42853	1.41671	1.31953	3.86741
	C22:6n3	Docosahexaenoic acid	0.619125	0.534718	24.8507	0.57125	0.4266	17.9244	1.46987	0.72376	30.7486	9.3274	9.01444	25.4624
			2.49137			3.18699			4.7803			36.6321
		Standard deviation
	Fatty acid classes	Small winter female	Small spring female	Large winter female	Large spring female
	SFA	0.270766	0.431955	0.438019	2.71503
	MUFA	0.271609	0.551887	0.621001	5.44269
	PUFA n6	-	-	-	0.156221
	PUFA n3	0.457762	0.382502	0.828764	6.37908
	PUFA	0.457762	0.382502	0.828764	5.67133
	Total FA	0.329836	0.461774	0.620573	4.65497

## Sheet: Final table
		Winter		Spring
	Fatty acid	Small	Large	Small	Large		SFA	Saturated fatty acids
	C14:0	n.d.	0.11 ± 0.02a (2.36)	n.d.	0.63 ± 0.61a (1.72)		MUFA	Monounsaturated fatty acids
	C15:0	n.d.	n.d.	n.d.	0.21 ± 0.06 (0.57)		PUFA	Polyunsaturated fatty acids
	C16:0	0.52 ± 0.33a (20.7)	0.76 ± 0.53a (15.8)	0.74 ± 0.51a (23.36)	5.52 ± 3.72b (15.06)		FA	Fatty acids
	C17:0	0.15 ± 0.04a (5.82)	0.12* (2.51)	0.12 ± 0.03a (3.8)	0.31 ± 0.17b (0.84)
	C18:0	0.31 ± 0.16a (12.49)	0.39 ± 0.23a (8.18)	0.49 ± 0.29a (15.51)	2.64 ± 2.07b (7.22)
	C21:0	n.d.	n.d.	n.d.	0.18* (0.5)
	C23:0	n.d.	n.d.	n.d.	0.88 ± 0.52 (2.4)
	C24:0	n.d.	n.d.	n.d.	0.2 ± 0.08 (0.55)
	Ʃ SFA	0.98 ± 0.27a (39.01)	1.38 ± 0.44b (28.86)	1.35 ± 0.43b (42.67)	10.57 ± 2.72c (28.87)
	C14:1	n.d.	n.d.	0.14 ± 0.03a (4.42)	0.07 ± 0.01b (0.2)
	C16:1	0.14 ± 0.06a (5.67)	0.2 ± 0.06a (4.08)	0.15 ± 0.04a (4.79)	0.96 ± 0.71b (2.61)
	C17:1	n.d.	n.d.	n.d.	0.27 ± 0.13 (0.74)
	C18:1n9	0.39 ± 0.3a (15.87)	1.08 ± 0.69b (22.52)	0.74 ± 0.67ab (23.34)	9.85 ± 8.07c (26.88)
	C20:1	n.d.	0.24 ± 0.11a (5.05)	n.d.	1.67 ± 1.29b (4.55)
	C22:1	n.d.	n.d.	n.d.	0.38 ± 0.13 (1.03)
	C24:1	n.d.	n.d.	n.d.	0.24 ± 0.09 (0.67)
	Ʃ MUFA	0.53 ± 0.27a (21.54)	1.52 ± 0.62b (31.65)	1.03 ± 0.55ab (32.55)	13.44 ± 5.44c (36.69)
	C18:2n6t	n.d.	n.d.	n.d.	0.22 ± 0.2 (0.61)
	C18:2n6c	n.d.	n.d.	n.d.	0.19 ± 0.04 (0.51)
	C18:3n6	n.d.	n.d.	n.d.	0.28 ± 0.17 (0.76)
	C20:2n6	n.d.	n.d.	n.d.	0.08* (0.23)
	Ʃ PUFA n6	n.d.	n.d.	n.d.	0.77 ± 0.16 (2.11)
	C18:3n3	n.d.	n.d.	n.d.	0.2 ± 0.03 (0.56)
	C20:3n3	0.36 ± 0.21a (14.59)	0.16 ± 0.02b (3.31)	0.22 ± 0.03c (6.85)	0.9 ± 0.65d (2.45)
	C20:5n3	n.d.	0.26 ± 0.04a (5.43)	n.d.	1.42 ± 1.32b (3.87)
	C22:6n3	0.62 ± 0.53a (24.85)	1.47 ± 0.72b (3.75)	0.57 ± 0.43a (17.92)	9.53 ± 9.01c (25.46)
	Ʃ PUFA n3	0.98 ± 0.46a (39.44)	1.89 ± 0.83b (39.49)	0.79 ± 0.38a (24.77)	12.05 ± 6.38c (32.33)
	Ʃ PUFA	0.98 ± 0.46a (39.44)	1.89 ± 0.83b (39.49)	0.79 ± 0.38a (24.77)	12.82 ± 5.67c (34.44)
	Total FA	2.49 ± 0.33a	4.79 ± 0.62b	3.17 ± 0.46c	36.83 ± 4.65d
